# Supplementary material for: A new classification of HLA-DRB1 alleles based on acid–base properties of the amino acids located at positions 13, 70 and 71: impact on ACPA status or structural progression, and meta-analysis on 1235 patients with rheumatoid from two cohorts (ESPOIR and EAC cohort)
Source: HighWire-hosted journal article supplement (doi:10.1136/rmdopen-2015-000099), 2015-11-01
Supplement: rmdopen-2015-000099supp_tables.pdf [file rmdopen-2015-000099supp_tables.pdf]

## Appendix 1

Table S1: Acid-base classification of *HLA-DRB1* alleles

| <i>HLA-DRB1</i> alleles                              | AA sequence at positions 13,70–74 | Tezenas' classification | Mattey's classification | De Vries' classification | Reviron | Acid-base classification |
|------------------------------------------------------|-----------------------------------|-------------------------|-------------------------|--------------------------|---------|--------------------------|
| *01:03, *04:02,<br>*11:02; *13:01,<br>*13:02, *13:04 | x** <sup>-</sup> -D-E-RAA         | S1                      | D70+                    | P                        | XP4n    | A                        |
| *11:03,                                              | x** <sup>-</sup> -D-E-RAA         | S1                      | D70+                    | N                        | XP4n    | A                        |
| *13:23; *15                                          | R-Q-A-RAA                         | S1                      | D70-                    | P                        | XP4p    | BN                       |
| *13:03                                               | S-D-K-RAA                         | S2                      | D70+                    | P                        | XP4n    | NN                       |
| *04:01; *04:13                                       | H-Q-K-RAA                         | S2                      | SE                      | SE                       | SE      | BB                       |
| *12:01, *13:06,<br>*13:25, *14:22,                   | G-D-R-RAA                         | S3D                     | D70+                    | P                        | XP4n    | NN                       |
| *11:01, *11:04,<br>*13:05; *16                       | S-D-R-RAA                         | S3D                     | D70+                    | N                        | XP4p    | NN                       |
| *01:01, *01:02                                       | F-Q-R-RAA                         | S3P                     | SE                      | SE                       | SE      | BN                       |
| *04:04, *04:05,<br>*04:08                            | H-Q-R-RAA                         | S3P                     | SE                      | SE                       | SE      | BB                       |
| *14:02                                               | S-Q-R-RAA                         | S3P                     | SE                      | SE                       | SE      | BN                       |
| *10:01                                               | F-R-R-RAA                         | S3P                     | SE                      | SE                       | SE      | BN                       |
| *03                                                  | x** <sup>-</sup> -Q-K-RGR         | X                       | D70-                    | N                        | XP4p    | X                        |
| *04:03, *04:06;<br>*04:07, *04:11;<br>*04:59         | x** <sup>-</sup> -Q-R-RAE         | X                       | D70-                    | N                        | XP4p    | X                        |

|                |             |   |      |   |      |   |
|----------------|-------------|---|------|---|------|---|
| *07:01         | x**-D-R-RGQ | X | D70+ | P | XP4n | X |
| *08            | x**-D-R-RAL | X | D70+ | N | XP4n | X |
| *09:01         | x**-R-R-RAE | X | D70- | N | XP4p | X |
| *14:01; *14:04 | x**-R-R-RAE | X | D70- | N | XP4p | X |

RA : rheumatoid arthritis; AA: amino acid; D for aspartic acid, Q for glutamine, R for arginine, A for alanine, E for glutamic acid, K for lysine, G for glycine, L for leucine, I for isoleucine; F for phenylalanine; ACPA: anti-citrullinated peptide antibodies; BB: allele group containing basic AA at position 13, 70 and 71, BN: allele group containing either a basic amino acid at position 13 and a neutral or acid and basic amino acid at position 70 and 71 or a neutral amino acid at position 13 and a basic amino acid at position 70 and 71, A: allele group containing acid amino acids at position 70 and 71; NN: allele group with a neutral amino acid at position 13 and either a basic and an acidic amino acid at positions 70 and 71 or 2 neutral amino acids at position 70 and 71; X: allele group not containing RAA sequence at position 72-74;; N: allele group not containing an isoleucine at position 67; P: allele group containing an isoleucine at position 67; SE: Shared Epitope; D70-: allele group not containing an aspartic acid at position 70; D70+: allele group containing an aspartic acid at position 70. XP4p: fourth pocket positively charged according to Revirion's classification; XP4n: fourth pocket not charged or negatively charged;\*\* : the amino acid at position 13 could be a Serine, Histidine, Glycine, Tryptophane or a Phenylalanine

Table S2: Number of patients with ACPA presence depending on *HLA-DRB1* allele carriage according to acid-base classification in ESPOIR and EAC

| Cohort                | ESPOIR        |              | EAC           |              |
|-----------------------|---------------|--------------|---------------|--------------|
|                       | ACPA-presence | ACPA-absence | ACPA-presence | ACPA-absence |
| BB carriers           | 162 (71.4)    | 65 (28.6)    | 177 (70.8)    | 73 (29.2)    |
| BB non carriers       | 135 (35.1)    | 250 (64.9)   | 137 (40.1)    | 205 (59.9)   |
| BN carriers           | 135 (50.4)    | 133 (49.6)   | 143 (55.0)    | 117 (45.0)   |
| BN non carriers       | 162 (47.1)    | 182 (52.9)   | 171 (51.5)    | 161 (48.5)   |
| A carriers            | 45 (30.6)     | 102 (69.4)   | 39 (33.6)     | 77 (66.4)    |
| A non carriers        | 252 (54.2)    | 213 (45.8)   | 275 (57.8)    | 201 (42.2)   |
| NN and X carriers     | 167 (40.8)    | 242 (59.2)   | 183 (47.0)    | 206 (53.0)   |
| NN and X non carriers | 130 (64.0)    | 73 (36.0)    | 131 (64.5)    | 72 (35.5)    |

BB: allele group containing basic AA at position 13, 70 and 71, BN: allele group containing either a basic amino acid at position 13 and a neutral or acid and basic amino acid at position 70 and 71 or a neutral amino acid at position 13 and a basic amino acid at position 70 and 71, A: allele group containing acid amino acids at position 70 and 71; NN: allele group with a neutral amino acid at position 13 and either a basic and an acidic amino acid at positions 70 and 71 or 2 neutral amino acids at position 70 and 71; X: allele group not containing RAA sequence at position 72-74;

Table S3 : Number of patients with ACPA presence depending on *HLA-DRB1* genotypes according to acid-base classification in ESPOIR and EAC

| Number of patients with ACPA presence (%) | ESPOIR    | EAC       |
|-------------------------------------------|-----------|-----------|
| NN/NN, X/NN or XX referent                | 30 (32.6) | 31 (34.0) |
| SA/SA, SA/NN or SA/X                      | 20 (22.2) | 13 (20.3) |
| BN/BN, BN/NN or BN/X                      | 77 (45.0) | 83 (51.9) |
| SA/BB                                     | 17 (68.0) | 16 (64.0) |
| BN/BB                                     | 50 (76.9) | 50 (68.5) |
| BB/BB                                     | 33 (86.8) | 29 (93.5) |

BB: allele group containing basic AA at position 13, 70 and 71, BN: allele group containing either a basic amino acid at position 13 and a neutral or acid and basic amino acid at position 70 and 71 or a neutral amino acid at position 13 and a basic amino acid at position 70 and 71, A: allele group containing acid amino acids at position 70 and 71; NN: allele group with a neutral amino acid at position 13 and either a basic and an acidic amino acid at positions 70 and 71 or 2 neutral amino acids at position 70 and 71; X: allele group not containing RAA sequence at position 72-74;

Table S4: Number of patients with progression depending on *HLA-DRB1* allele carriage according to acid-base classification in ESPOIR and EAC

|                       | ESPOIR                                |                                          | EAC                                   |                                          |
|-----------------------|---------------------------------------|------------------------------------------|---------------------------------------|------------------------------------------|
|                       | Patients with progression, number (%) | Patients without progression, number (%) | Patients with progression, number (%) | Patients without progression, number (%) |
| BB carriers           | 85 (44.3)                             | 107 (55.7)                               | 85 (47.2)                             | 95 (52.8)                                |
| BB non carriers       | 67 (20.7)                             | 257 (79.3)                               | 79 (33.5)                             | 157 (66.5)                               |
| BN carriers           | 65 (28.8)                             | 161 (71.2)                               | 74 (40.7)                             | 108 (59.3)                               |
| BN non carriers       | 87 (30.0)                             | 203 (70.0)                               | 90 (38.5)                             | 144 (61.5)                               |
| A carriers            | 20 (15.4)                             | 110 (84.6)                               | 16 (20.0)                             | 64 (80.0)                                |
| A non carriers        | 132 (34.2)                            | 254 (65.8)                               | 148 (44.1)                            | 188 (56.0)                               |
| NN and X carriers     | 90 (26.3)                             | 252 (73.7)                               | 101 (37.4)                            | 169 (62.6)                               |
| NN and X non carriers | 62 (35.6)                             | 112 (64.4)                               | 63 (43.2)                             | 83 (56.9)                                |

BB: allele group containing basic AA at position 13, 70 and 71, BN: allele group containing either a basic amino acid at position 13 and a neutral or acid and basic amino acid at position 70 and 71 or a neutral amino acid at position 13 and a basic amino acid at position 70 and 71, A: allele group containing acid amino acids at position 70 and 71; NN: allele group with a neutral amino acid at position 13 and either a basic and an acidic amino acid at positions 70 and 71 or 2 neutral amino acids at position 70 and 71; X: allele group not containing RAA sequence at position 72-74;

Table S5. ACPA presence in patients with or without progression according to each allele of acid-base classification

| Allele carriage | ESPOIR                                              |                                                        |         | EAC                                                 |                                                        |         |
|-----------------|-----------------------------------------------------|--------------------------------------------------------|---------|-----------------------------------------------------|--------------------------------------------------------|---------|
|                 | ACPA presence in patients with progression<br>N (%) | ACPA presence in patients without progression<br>N (%) | p value | ACPA presence in patients with progression<br>N (%) | ACPA presence in patients without progression<br>N (%) | p value |
| A               | 13 (65)                                             | 28 (25)                                                | <0.001  | 10 (67)                                             | 17 (27)                                                | 0.003   |
| BB              | 72 (85)                                             | 71 (66)                                                | 0.004   | 76 (89)                                             | 55 (59)                                                | <0.001  |
| BN              | 46 (71)                                             | 69 (43)                                                | <0.001  | 62 (86)                                             | 41 (38)                                                | <0.001  |
| X and NN        | 66 (73)                                             | 82 (33)                                                | <0.001  | 69 (70)                                             | 65 (39)                                                | <0.001  |

BB: allele group containing basic AA at position 13, 70 and 71, BN: allele group containing either a basic amino acid at position 13 and a neutral or acid and basic amino acid at position 70 and 71 or a neutral amino acid at position 13 and a basic amino acid at position 70 and 71, A: allele group containing acid amino acids at position 70 and 71; NN: allele group with a neutral amino acid at position 13 and either a basic and an acidic amino acid at positions 70 and 71 or 2 neutral amino acids at position 70 and 71; X: allele group not containing RAA sequence at position 72-74;

Table S6: Number of patients with progression depending on *HLA-DRB1* genotypes according to acid-base classification in ESPOIR and EAC

| Number of patients with progression (%) | ESPOIR    | EAC       |
|-----------------------------------------|-----------|-----------|
| NN/NN, X/NN or XX referent              | 18 (24.3) | 25 (37.3) |
| SA/SA, SA/NN or SA/X                    | 7 (8.9)   | 9 (20.9)  |
| BN/BN, BN/NN or BN/X                    | 37 (26.1) | 42 (39.3) |
| SA/BB                                   | 8 (36.4)  | 4 (22.2)  |
| BN/BB                                   | 23 (41.8) | 29 (51.8) |
| BB/BB                                   | 18 (52.9) | 15 (65.2) |

BB: allele group containing basic AA at position 13, 70 and 71, BN: allele group containing either a basic amino acid at position 13 and a neutral or acid and basic amino acid at position 70 and 71 or a neutral amino acid at position 13 and a basic amino acid at position 70 and 71, A: allele group containing acid amino acids at position 70 and 71; NN: allele group with a neutral amino acid at position 13 and either a basic and an acidic amino acid at positions 70 and 71 or 2 neutral amino acids at position 70 and 71; X: allele group not containing RAA sequence at position 72-74;
